# Supplementary figures and images for: Characterization of mesoporous calcium phosphates from calcareous marine sediments containing Si, Sr and Zn for bone tissue engineering
Source: Royal Society of Chemistry journal article supplement (doi:10.1039/c6tb02255c), 2016-01-01

500x

2000x

10000x

*fm*-CaP1.7

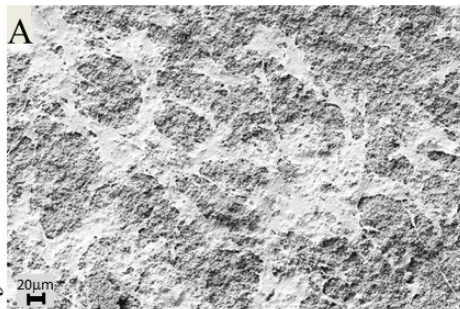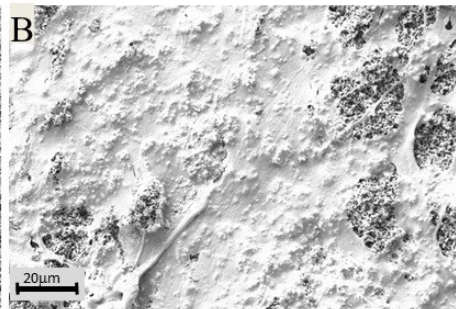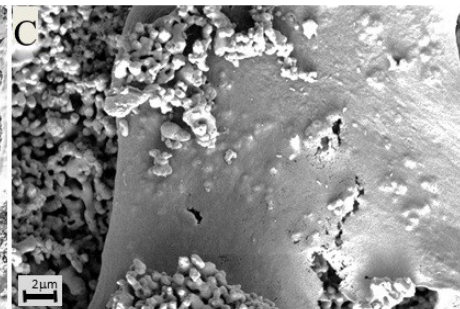

*fm*-CaP1.4

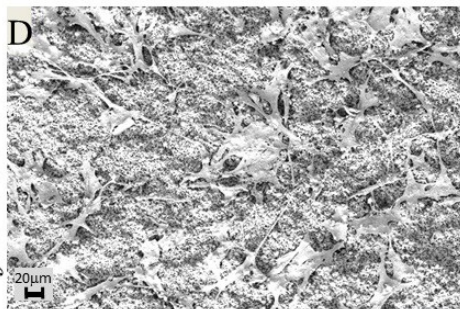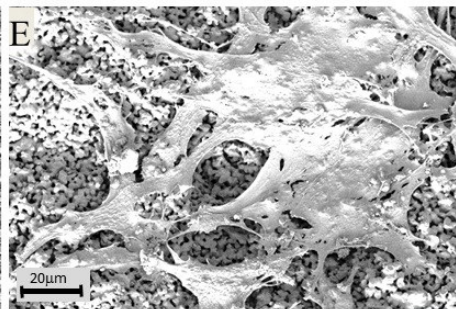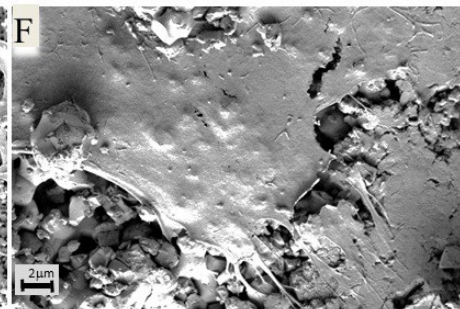

Supplement: c6tb02255c3.pdf [file c6tb02255c3.pdf]
